# Supplementary material
Source: PubMed Central journal article supplement (PMC6046037)

**A****Men**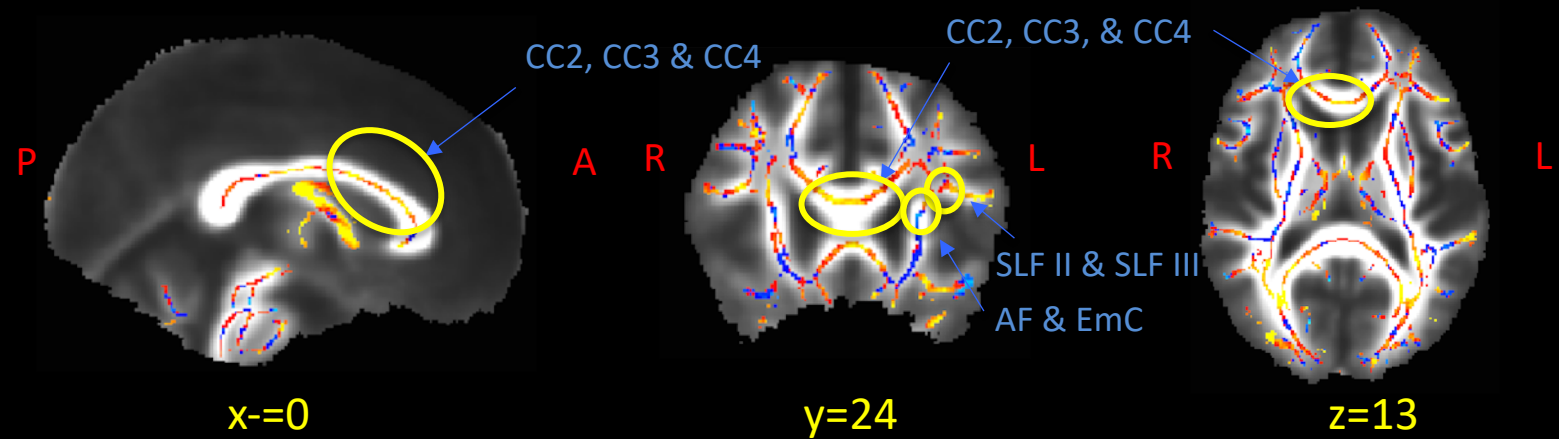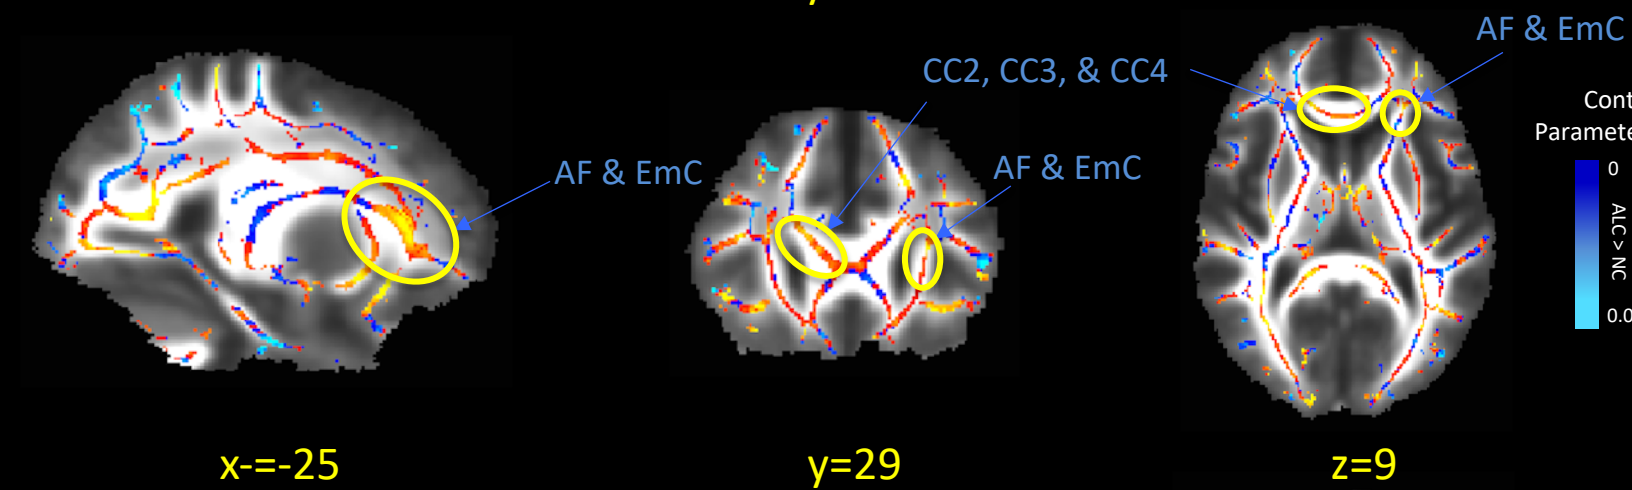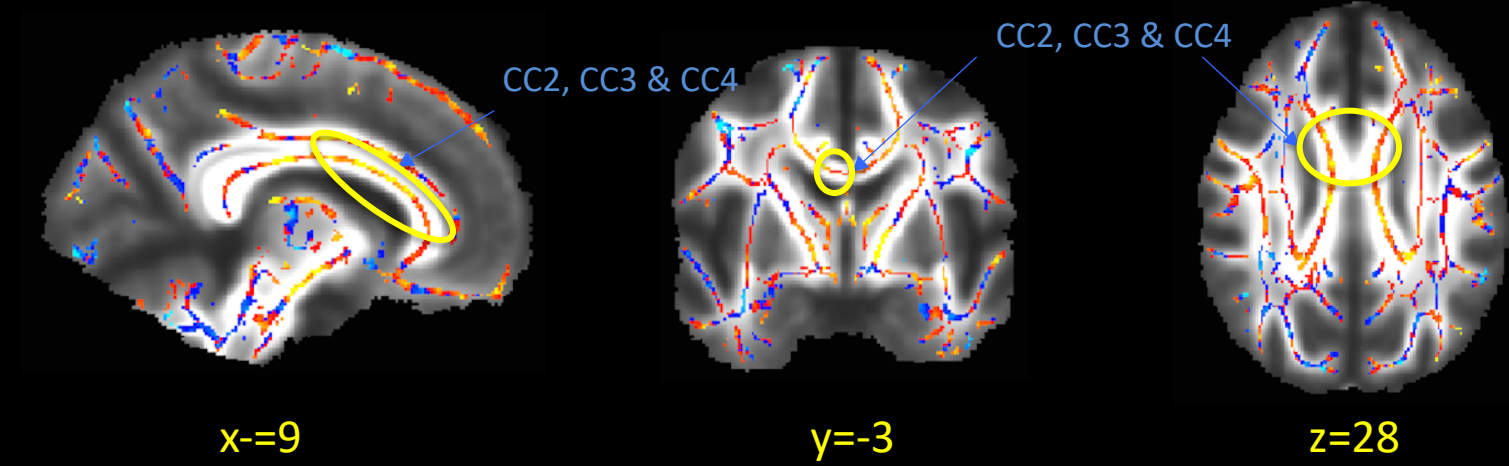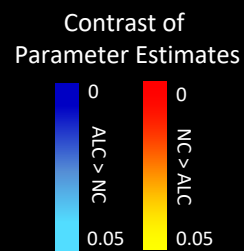**B****Women**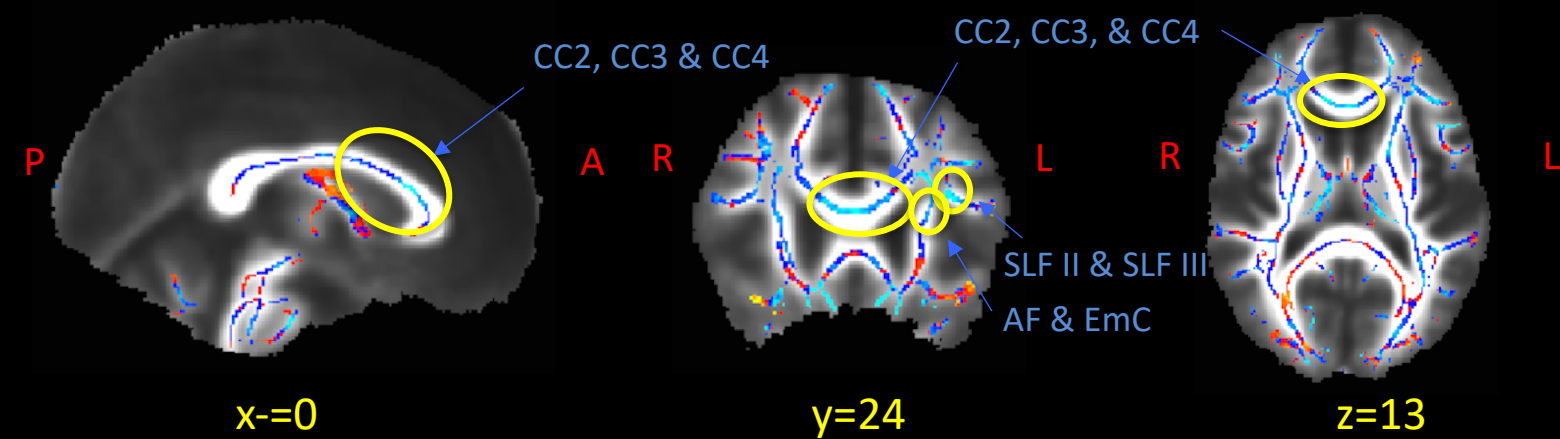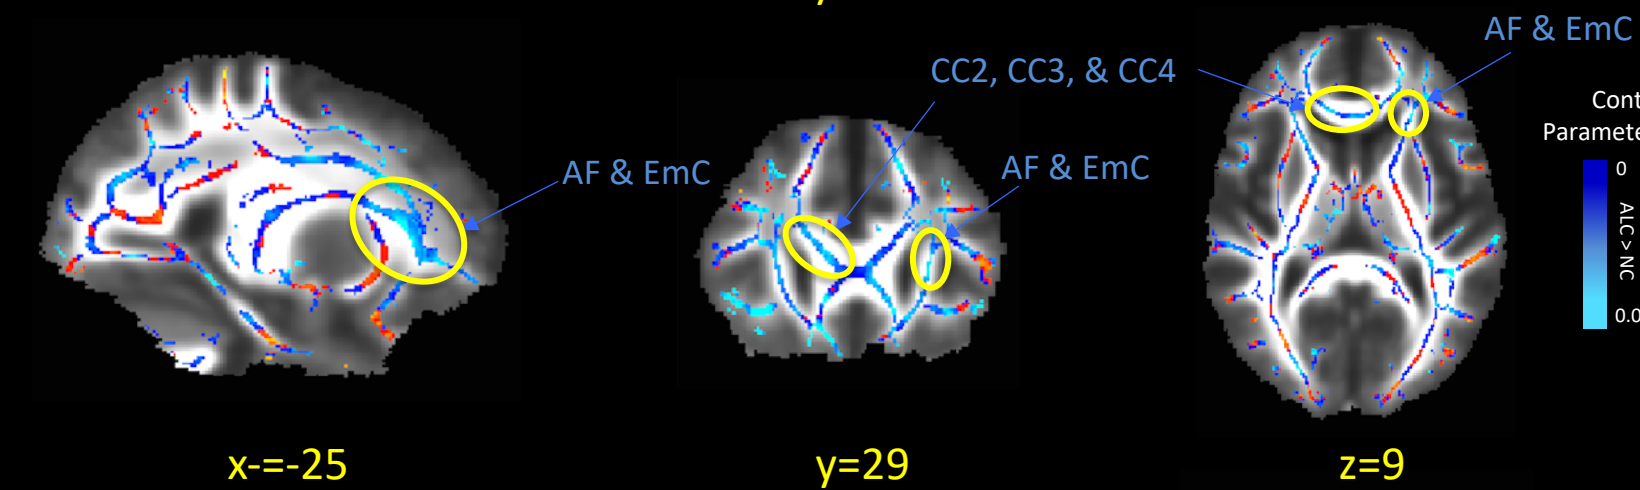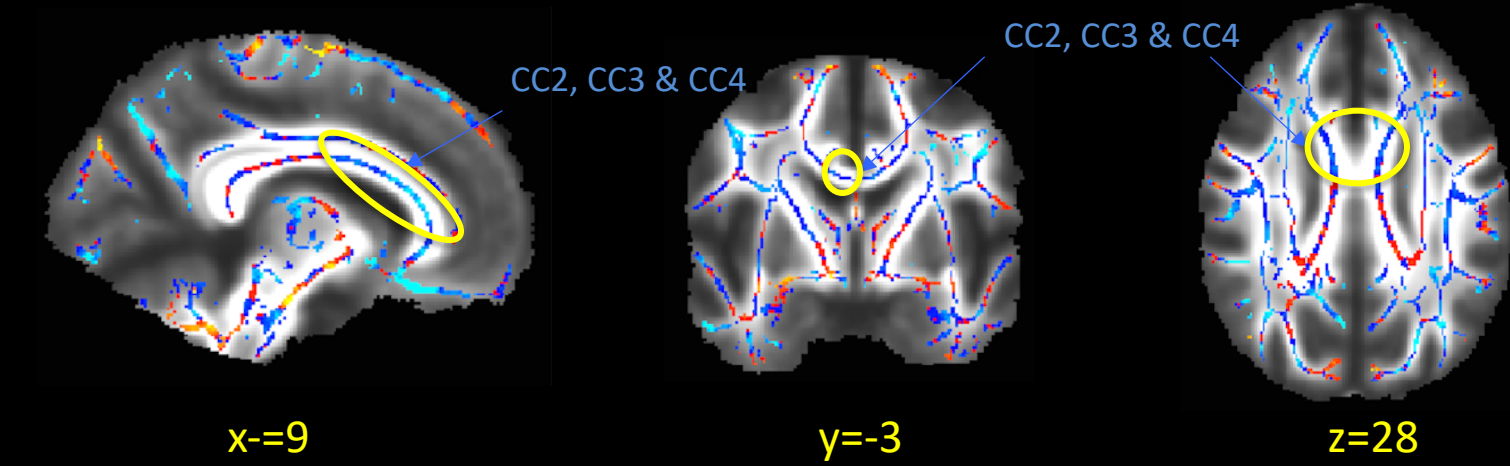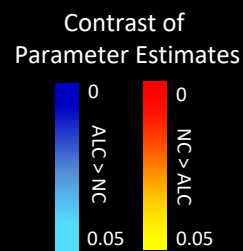

Supplement: 41386_2018_89_MOESM1_ESM.pdf [file 41386_2018_89_MOESM1_ESM.pdf]

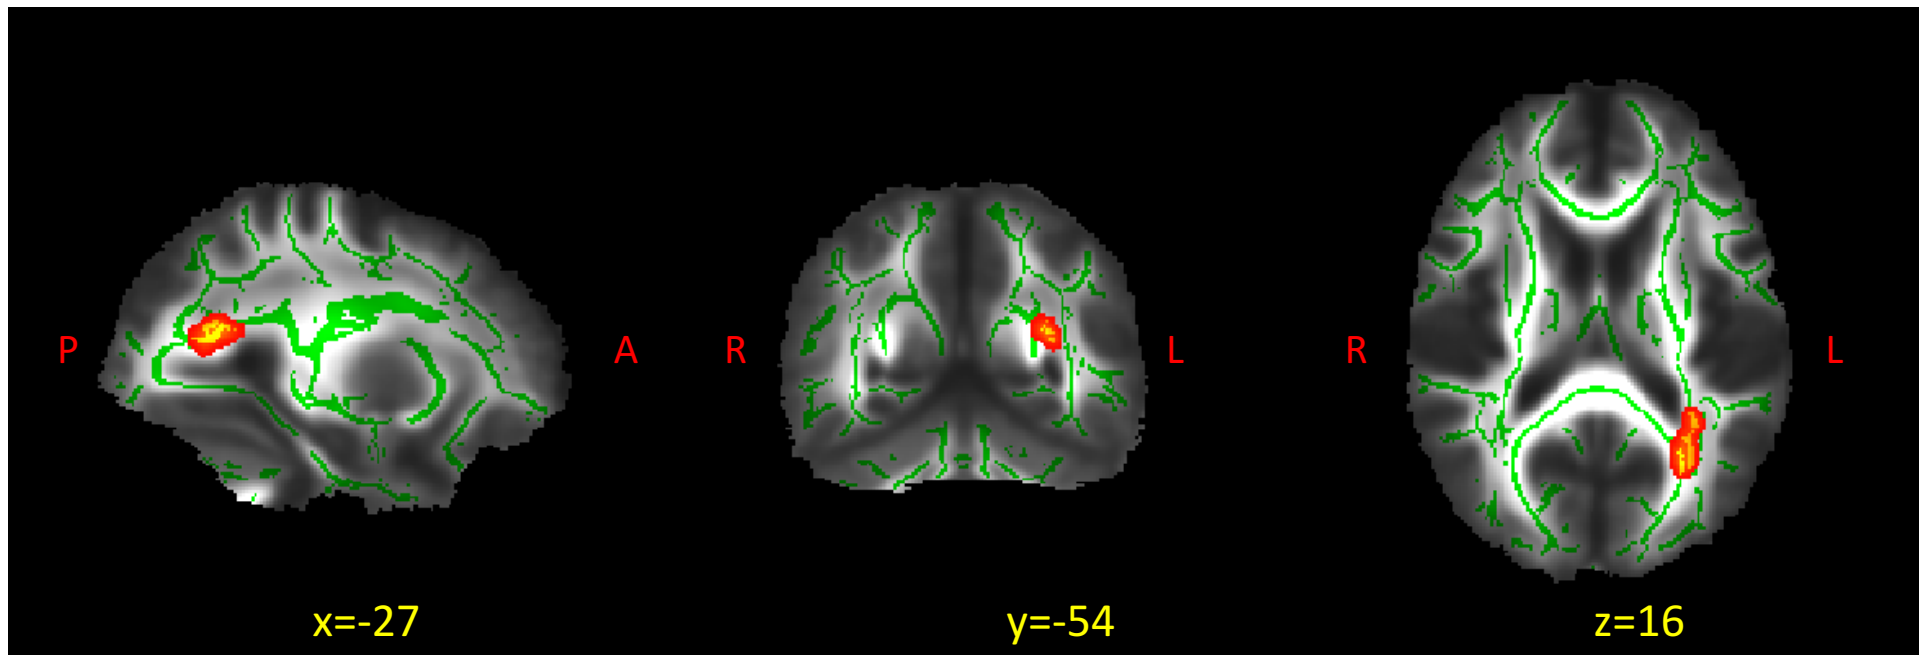

Supplement: 41386_2018_89_MOESM2_ESM.pdf [file 41386_2018_89_MOESM2_ESM.pdf]

# PTR

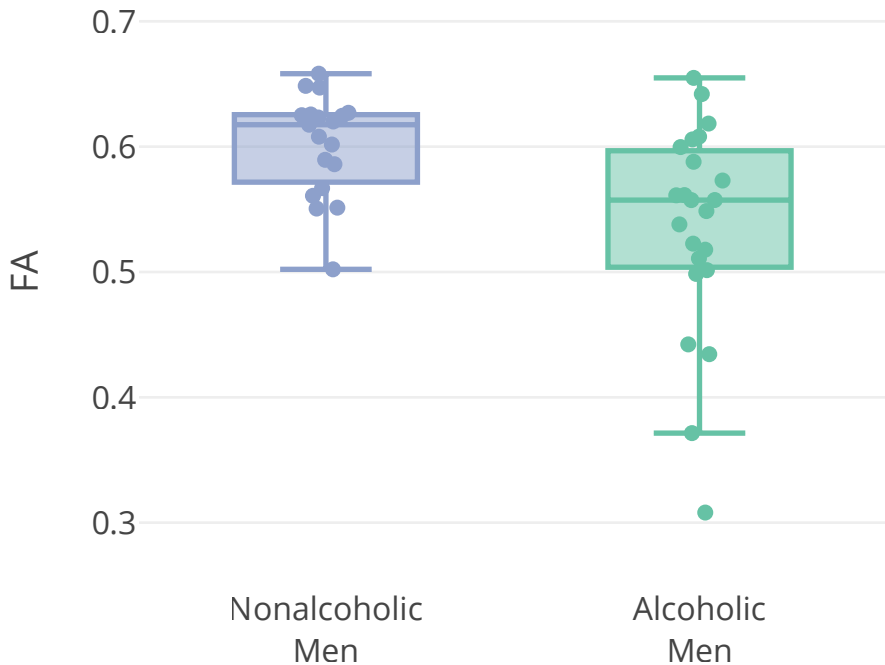

Supplement: 41386_2018_89_MOESM3_ESM.pdf [file 41386_2018_89_MOESM3_ESM.pdf]
